# Supplementary material for: InChIKey collision resistance: an experimental testing
Source: PubMed Central journal article supplement (PMC3558395; doi:10.1186/1758-2946-4-39), 2012-12-20
Supplement: 1758-2946-4-39-S1.pdf [file 1758-2946-4-39-S1.pdf]

**Figure S1.** Example of algorithmic definition of molecular formula range for structure generation in ACD/Structure Elucidator. The data define the range of molecular formulae  $C_{2-6}H_{0-24}C_{1-3}F_{1-3}O_{0-3}$  and RDBE (Ring Double Bond Equivalents) range 0-2 that corresponds to 484 specific molecular formulae used in structure generation in this set.

**Molecular Formula Generator**

Allowed Elements

| Name | Mass      | Range | RDBE |
|------|-----------|-------|------|
| C    | 12.000000 | 2-6   | 1.0  |
| H    | 1.007825  | 0-24  | -0.5 |
| O    | 15.994915 | 0-3   | 0.0  |
| F    | 18.998403 | 1-3   | -0.5 |
| Cl   | 34.968853 | 1-3   | -0.5 |

Monoisotopic Mass (Da)

m/z Value (Da)  ±

M+H Ion
  M-H Ion

Rings and Double Bonds Equivalent

RDBE

Allow Integer Values
  Allow Fractional Values

MF (Selected/Displayed/Total - 484/484/484)

| # | MF                                                           | Mass       | RDBE |
|---|--------------------------------------------------------------|------------|------|
| 1 | C <sub>2</sub> Cl <sub>1</sub> F <sub>1</sub>                | 77.967256  | 2.0  |
| 2 | C <sub>2</sub> Cl <sub>3</sub> F <sub>1</sub>                | 147.904961 | 1.0  |
| 3 | C <sub>2</sub> Cl <sub>2</sub> F <sub>2</sub>                | 131.934512 | 1.0  |
| 4 | C <sub>2</sub> Cl <sub>1</sub> F <sub>3</sub>                | 115.964062 | 1.0  |
| 5 | C <sub>2</sub> Cl <sub>3</sub> F <sub>3</sub>                | 185.901768 | 0.0  |
| 6 | C <sub>2</sub> Cl <sub>2</sub> F <sub>1</sub> H <sub>1</sub> | 113.943934 | 1.0  |
| 7 | C <sub>2</sub> Cl <sub>1</sub> F <sub>2</sub> H <sub>1</sub> | 97.973484  | 1.0  |

Generator Options

Apply Nitrogen Rule

**Table S1.** The number of isomers generated for the compounds of molecular formulae in range  $C_6H_{8-9}Cl_{1-3}F_{1-3}O_{0-3}$ .

| #            | Formula     | MW       | RDBE | Number of isomers |
|--------------|-------------|----------|------|-------------------|
| 1            | C6H8F1Cl1   | 134.0299 | 2    | 1391              |
| 2            | C6H8F1Cl3   | 203.9676 | 1    | 2702              |
| 3            | C6H8F2Cl2   | 187.9971 | 1    | 3668              |
| 4            | C6H8F3Cl1   | 172.0267 | 1    | 2702              |
| 5            | C6H8F3Cl3   | 241.9644 | 0    | 3012              |
| 6            | C6H8O1F1Cl1 | 150.0248 | 2    | 18104             |
| 7            | C6H8O1F1Cl3 | 219.9625 | 1    | 36777             |
| 8            | C6H8O1F2Cl2 | 203.992  | 1    | 50194             |
| 9            | C6H8O1F3Cl1 | 188.0216 | 1    | 36777             |
| 10           | C6H8O1F3Cl3 | 257.9593 | 0    | 42245             |
| 11           | C6H8O2F1Cl1 | 166.0197 | 2    | 134456            |
| 12           | C6H8O2F1Cl3 | 235.9574 | 1    | 283399            |
| 13           | C6H8O2F2Cl2 | 219.9869 | 1    | 390235            |
| 14           | C6H8O2F3Cl1 | 204.0165 | 1    | 283399            |
| 15           | C6H8O2F3Cl3 | 273.9542 | 0    | 334098            |
| 16           | C6H8O3F1Cl1 | 182.0146 | 2    | 731783            |
| 17           | C6H8O3F1Cl3 | 251.9523 | 1    | 1595093           |
| 18           | C6H8O3F2Cl2 | 235.9819 | 1    | 2211485           |
| 19           | C6H8O3F3Cl1 | 220.0114 | 1    | 1595093           |
| 20           | C6H8O3F3Cl3 | 289.9491 | 0    | 1928091           |
| 21           | C6H9F1Cl2   | 170.0065 | 1    | 1348              |
| 22           | C6H9F2Cl1   | 154.0361 | 1    | 1348              |
| 23           | C6H9F2Cl3   | 223.9738 | 2    | 1494              |
| 24           | C6H9F3Cl2   | 208.0033 | 2    | 1494              |
| 25           | C6H9O1F1Cl2 | 186.0014 | 1    | 17726             |
| 26           | C6H9O1F2Cl1 | 170.031  | 1    | 17726             |
| 27           | C6H9O1F2Cl3 | 239.9687 | 2    | 20266             |
| 28           | C6H9O1F3Cl2 | 223.9983 | 2    | 20266             |
| 29           | C6H9O2F1Cl2 | 201.9964 | 1    | 133242            |
| 30           | C6H9O2F2Cl1 | 186.0259 | 1    | 133242            |
| 31           | C6H9O2F2Cl3 | 255.9636 | 2    | 156448            |
| 32           | C6H9O2F3Cl2 | 239.9932 | 2    | 156448            |
| 33           | C6H9O3F1Cl2 | 217.9913 | 1    | 734507            |
| 34           | C6H9O3F2Cl1 | 202.0208 | 1    | 734507            |
| 35           | C6H9O3F2Cl3 | 271.9585 | 2    | 884820            |
| 36           | C6H9O3F3Cl2 | 255.9881 | 2    | 884820            |
| <b>TOTAL</b> |             |          |      | <b>13 584 406</b> |

**Table S2.** Number of InChIKeys containing various letters at the specific position of first block for a set of 998753 isomers with molecular formula  $C_9H_8O_1$  (non-truncated version of Table 2 of the paper).

| Position | 1     | 2     | 3     | 4     | 5     | 6     | 7     | 8     | 9     | 10    | 11    | 12    | 13    | 14    |
|----------|-------|-------|-------|-------|-------|-------|-------|-------|-------|-------|-------|-------|-------|-------|
| A        | 41424 | 38195 | 37819 | 41079 | 38163 | 38223 | 41584 | 37995 | 38514 | 41357 | 38061 | 38319 | 50838 | 38899 |
| B        | 41217 | 38051 | 38488 | 41389 | 38072 | 38485 | 41513 | 38084 | 38388 | 40757 | 37861 | 38578 | 50682 | 39406 |
| C        | 41269 | 38190 | 38517 | 41184 | 37948 | 38439 | 41297 | 37723 | 38549 | 41181 | 37763 | 38376 | 50781 | 39005 |
| D        | 41001 | 38206 | 38037 | 41580 | 37855 | 38360 | 41168 | 38238 | 38336 | 41234 | 38090 | 38485 | 51039 | 38854 |
| E        | 0     | 37959 | 38651 | 0     | 38143 | 38340 | 0     | 37889 | 38438 | 0     | 38057 | 38177 | 50742 | 39086 |
| F        | 41368 | 37881 | 38109 | 41273 | 38039 | 38453 | 41247 | 38292 | 38428 | 40631 | 38246 | 37991 | 51004 | 39064 |
| G        | 41211 | 38055 | 38334 | 41190 | 38036 | 38452 | 41141 | 37933 | 38651 | 41049 | 38242 | 38209 | 50887 | 38874 |
| H        | 41262 | 37943 | 37998 | 41162 | 37801 | 38369 | 41324 | 38210 | 38338 | 41324 | 38274 | 38502 | 50697 | 39151 |
| I        | 41330 | 37739 | 38168 | 41354 | 38124 | 38463 | 41110 | 37906 | 38618 | 41140 | 37994 | 38479 | 50573 | 39028 |
| J        | 40967 | 37946 | 38477 | 40784 | 38036 | 38427 | 41339 | 38171 | 38576 | 41236 | 37891 | 38246 | 50684 | 39019 |
| K        | 41119 | 38238 | 38530 | 41291 | 38100 | 38092 | 41212 | 37770 | 38352 | 41461 | 37850 | 38900 | 50790 | 39227 |
| L        | 41266 | 38067 | 37861 | 41248 | 38019 | 38485 | 41671 | 38065 | 38252 | 41211 | 37810 | 38352 | 50797 | 38981 |
| M        | 41228 | 38068 | 38678 | 41046 | 38074 | 38626 | 41168 | 38144 | 38536 | 41453 | 38130 | 38213 | 50337 | 38896 |
| N        | 41001 | 38069 | 38658 | 41005 | 37946 | 38241 | 40650 | 38361 | 38588 | 41435 | 37779 | 38069 | 50654 | 38998 |
| O        | 41017 | 37920 | 38332 | 41154 | 38307 | 38548 | 41385 | 38330 | 38015 | 40966 | 37632 | 38710 | 50555 | 38902 |
| P        | 41227 | 38280 | 38735 | 41008 | 38160 | 38360 | 41163 | 38371 | 38445 | 41105 | 38002 | 38330 | 50726 | 39038 |
| Q        | 41247 | 37967 | 38513 | 41177 | 37575 | 38078 | 41455 | 38142 | 38154 | 41163 | 38658 | 38468 | 51092 | 39066 |
| R        | 41280 | 37734 | 38436 | 41486 | 38141 | 38394 | 41077 | 38068 | 38508 | 41427 | 38204 | 38163 | 50340 | 39020 |
| S        | 41174 | 38053 | 38501 | 41240 | 38045 | 38354 | 41245 | 37849 | 38291 | 41615 | 37805 | 38216 | 50686 | 36967 |
| T        | 9923  | 38262 | 38535 | 9739  | 38222 | 38486 | 9514  | 38229 | 38588 | 9788  | 38312 | 38392 | 34849 | 37433 |
| U        | 41390 | 39657 | 38696 | 41152 | 39532 | 38536 | 41034 | 39553 | 38206 | 41137 | 39806 | 38322 | 0     | 36874 |
| V        | 41012 | 39788 | 38249 | 41019 | 39516 | 38546 | 41312 | 39609 | 38278 | 41331 | 39492 | 38460 | 0     | 36944 |
| W        | 41184 | 39533 | 38739 | 41441 | 39767 | 38473 | 41159 | 39252 | 38324 | 41214 | 39552 | 38755 | 0     | 37225 |
| X        | 41277 | 39600 | 38302 | 41026 | 39581 | 38485 | 41123 | 39670 | 38620 | 41213 | 39814 | 38887 | 0     | 36937 |
| Y        | 40993 | 39475 | 38893 | 41431 | 39911 | 38562 | 40964 | 39375 | 38350 | 41318 | 39776 | 38563 | 0     | 37171 |
| Z        | 41366 | 39877 | 38497 | 41295 | 39640 | 38476 | 40898 | 39524 | 38410 | 41007 | 39652 | 38591 | 0     | 36688 |

The data demonstrate that no InChIKey contains letter E at the positions 1, 4, 7, and 10; letters from U to Z at the position 13, and that letter T occurs four times less frequently at the positions 1, 4, 7, and 10.
